# Supplementary material for: 4-hydroxyphenylpyruvate dioxygenase promotes lung cancer growth via pentose phosphate pathway (PPP) flux mediated by LKB1-AMPK/HDAC10/G6PD axis
Source: PubMed Central journal article supplement (PMC6614486; doi:10.1038/s41419-019-1756-1), 2019-07-08
Supplement: 41419_2019_1756_MOESM8_ESM.pdf [file 41419_2019_1756_MOESM8_ESM.pdf]

**Supplementary Table 1. Expression of HPD protein in non-small cell lung cancer (NSCLC)**

| Diagnosis            | No.of case | HPD |    |    |     | Positive cases rate (%) | strong positive cases rate(%) |
|----------------------|------------|-----|----|----|-----|-------------------------|-------------------------------|
|                      |            | -   | +  | ++ | +++ |                         |                               |
| NSCLC                | 48         | 8   | 10 | 18 | 12  | 83.3%**                 | <b>62.5%**</b>                |
| Adjacent normal lung | 48         | 37  | 6  | 5  | 0   | 22.9%                   | 10.4%                         |

**Positive rate:** percentage of positive cases with +, ++, and +++ staining score.

**Strongly positive rate** (high-level expression): percentage of positive cases with ++ and +++ staining score.

\*\*  $p < 0.01$  compared with adjacent normal lung.
