# Supplementary material for: 4-hydroxyphenylpyruvate dioxygenase promotes lung cancer growth via pentose phosphate pathway (PPP) flux mediated by LKB1-AMPK/HDAC10/G6PD axis
Source: PubMed Central journal article supplement (PMC6614486; doi:10.1038/s41419-019-1756-1), 2019-07-08
Supplement: 41419_2019_1756_MOESM9_ESM.pdf [file 41419_2019_1756_MOESM9_ESM.pdf]

**Supplementary Table 2. Relationship between HPD protein overexpression and the clinicopathological features of NSCLC**

| Variables                 | No. of case<br>( <i>n</i> ) | HPD                         | $\chi^2$ | <i>P</i> value |
|---------------------------|-----------------------------|-----------------------------|----------|----------------|
|                           |                             | strong positive rate<br>(%) |          |                |
| <b>Gender</b>             |                             |                             |          |                |
| Male                      | 32                          | 20(62.5%)                   | 0.931    | 0.333          |
| Female                    | 16                          | 10(62.5%)                   |          |                |
| <b>Age (years)</b>        |                             |                             |          |                |
| >62                       | 31                          | 19(61.3%)                   | 0.261    | 0.167          |
| ≤62                       | 17                          | 11(64.7%)                   |          |                |
| <b>Tumor size</b>         |                             |                             |          |                |
| ≤4 cm                     | 21                          | 13(61.9%)                   | 0.483    | 0.667          |
| >4cm                      | 27                          | 17(63.0%)                   |          |                |
| <b>Histological grade</b> |                             |                             |          |                |
| Grade-1                   | 12                          | 4(33.3%)                    | 0.808    | 0.044*         |
| Grade-2                   | 14                          | 11(78.6%)                   |          |                |
| Grade-3                   | 22                          | 15(68.2%)                   |          |                |
| <b>TNM stage</b>          |                             |                             |          |                |
| I ~ II                    | 19                          | 10(52.6%)                   | 0.743    | 0.257          |
| III~IV                    | 29                          | 20(68.9%)                   |          |                |
| <b>Lymph node status</b>  |                             |                             |          |                |
| N0                        | 18                          | 8(44.4%)                    | 0.821    | 0.179          |
| N+                        | 30                          | 22(73.3%)                   |          |                |

\*  $p < 0.05$
