# Supplementary material for: 4-hydroxyphenylpyruvate dioxygenase promotes lung cancer growth via pentose phosphate pathway (PPP) flux mediated by LKB1-AMPK/HDAC10/G6PD axis
Source: PubMed Central journal article supplement (PMC6614486; doi:10.1038/s41419-019-1756-1), 2019-07-08
Supplement: 41419_2019_1756_MOESM10_ESM.pdf [file 41419_2019_1756_MOESM10_ESM.pdf]

**Supplementary Table 3. The sequence of PCR primers**

| Gene           | Sequence                                                                                       |
|----------------|------------------------------------------------------------------------------------------------|
| $\beta$ -actin | Forward primer: 5'- CATCGAGAAATTGAGACGGTG-3'<br>Reverse primer: 5'-CCTTGGAAGATGGTCTTGAT -3'    |
| G6PD           | Forward primer: 5- TGAGTCAGACAGGCTGGAAC -3'<br>Reverse primer: 5'- CACGGAAAAGAGAGGAGATG-3'     |
| 6PGD           | Forward primer: 5'- ACGTGGACATCCGCAAAG -3'<br>Reverse primer: 5'- GACTCGTCATACTCCTGCTTG -3'    |
| HPD            | Forward primer: 5'- GAGCAAGACAAGTTTGGGAAGG -3'<br>Reverse primer: 5'- GCATTTGGGCAGTTTAGGAA -3' |
| HDAC10         | Forward primer: 5'- CGCCATCTACTTCCACCCGA_-3'<br>Reverse primer: 5'- CCTGTGTAGCCCGTGTCTTCT -3'  |
