# Supplementary material for: 4-hydroxyphenylpyruvate dioxygenase promotes lung cancer growth via pentose phosphate pathway (PPP) flux mediated by LKB1-AMPK/HDAC10/G6PD axis
Source: PubMed Central journal article supplement (PMC6614486; doi:10.1038/s41419-019-1756-1), 2019-07-08
Supplement: 41419_2019_1756_MOESM11_ESM.pdf [file 41419_2019_1756_MOESM11_ESM.pdf]

**Supplementary Table 4. The sequence of HDAC10 WT, mutants, HPD and G6PD**

**promoter primers**

| Gene                  | Sequence                                                                                                                                                           |
|-----------------------|--------------------------------------------------------------------------------------------------------------------------------------------------------------------|
| HDAC10 WT             | Forward primer: 5'- GCTCTAGAGCCACCATGGACTACAAGGA<br>CGATGACGACAAGGGTTCTGGAGGCACGACTTACAGTGACA<br>AAG-3'<br>Reverse primer: 5'- CGGGATCCTTACATGCCGGGCACCACCCC -3'   |
| HDAC10<br>S368A       | Forward primer: 5'- GTGACCGCTGTGCCGATGGCCCC-3'<br>Reverse primer: 5'- GAGTGGCTGCTGGGGCTCGCCG-3'                                                                    |
| HDAC10<br>S373A       | Forward primer 5'- AGCCCCAGCAGCCACGCCCCAGAGGG-3'<br>Reverse primer: 5'- CGTGGCTGCTGGGGCTCATCGGCACA-3'                                                              |
| HDAC10<br>S393A       | Forward primer: 5'- TGTAAGGCAGCTGCAGCTGCACCGAG-3'<br>Reverse primer: 5'- CTGCAGCTGCCTTACACACTGGACCC-3'                                                             |
| HDAC10<br>S540A       | Forward primer: 5'- GAGGCGGCTGCCCTAGCCATGTTCCA-3'<br>Reverse primer: 5'- CTAGGGCAGCCGCCTCCTTGCCCCTG-3'                                                             |
| pCDH-Flag<br>HPD      | Forward primer: 5'-GCTCTAGAGCCACCATGGACTACAAGGA<br>CGATGACGACAAGGGTTCTGGAGGCACGACTTACAGTGACA<br>AAG-3'<br>Reverse primer: 5'- CGGGATCCTTACATGCCGGGCACCACCCC<br>-3' |
| pcDNA3.1-<br>Flag HPD | Forward primer: 5-CGGGATCCGCCACCATGGACTACAAGGACG<br>ATGACGACAAGGGTTCTGGAGGCACGACTTACAGTGACAAA<br>G-3'<br>Reverse primer: 5'-GCTCTAGATTACATGCCGGGCACCACCCC<br>-3'   |
| G6PD<br>promoter      | Forward primer: 5'- CGGGGTACCCAATTGTTGAAGTTG GTAGC<br>TGTGA -3'<br>Reverse primer: 5'- CCGCTCGAGAAGTGTACGACCGTTT CC -3'                                            |
